# Supplementary material
Source: MDPI journal article supplement (https://www.mdpi.com/2297-8739/11/3/78)
Supplement: s1 [file s1 › separations-2861405-supplementary.pdf]

### **Supporting information**

## **Comparison of Acid and Base Modified Biochar Derived from Douglas fir for Removal of Copper (II) from Wastewater**

Beatrice Arwenyo<sup>1,2</sup>, Prashan M. Rodrigo<sup>1</sup>, Olalekan A. Olabode<sup>1,3</sup>, Hashani P. Abeysinghe<sup>1</sup>, Jessie N. Tisdale<sup>1</sup>, Rose C. Azuba<sup>4</sup>, and Todd E. Mlsna<sup>1,\*</sup>

<sup>1</sup>Department of Chemistry, Mississippi State University, Mississippi State, MS 39762, USA.

<sup>2</sup>Department of Chemistry, Gulu University, P O Box 166, Gulu Uganda.

<sup>3</sup>Department of Pure and Applied Chemistry, Osun State University, Osogbo, Osun State, 230212, Nigeria.

<sup>4</sup>College of Veterinary Medicine, Animal Resources and Biosecurity, Makerere University, Box 7062 Kampala, Uganda.

\*Corresponding Author (Tel: 662- 325-6744; fax: 662-325-1618.

Email: [tmlsna@chemistry.msstate.edu](mailto:tmlsna@chemistry.msstate.edu)

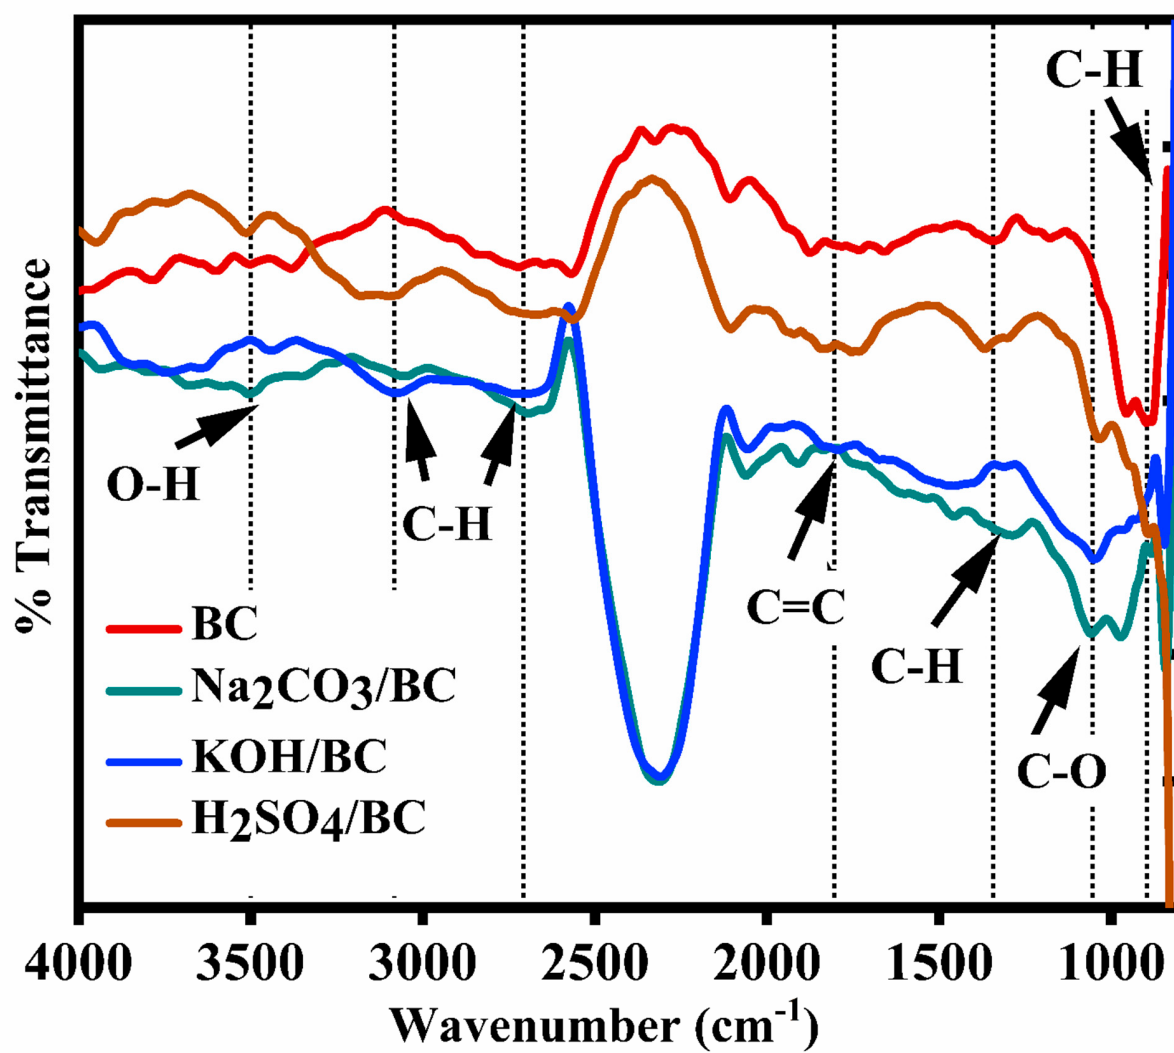

Figure S1. FTIR spectra of BC, KOH/BC, H<sub>2</sub>SO<sub>4</sub>/BC, and Na<sub>2</sub>CO<sub>3</sub>/BC.

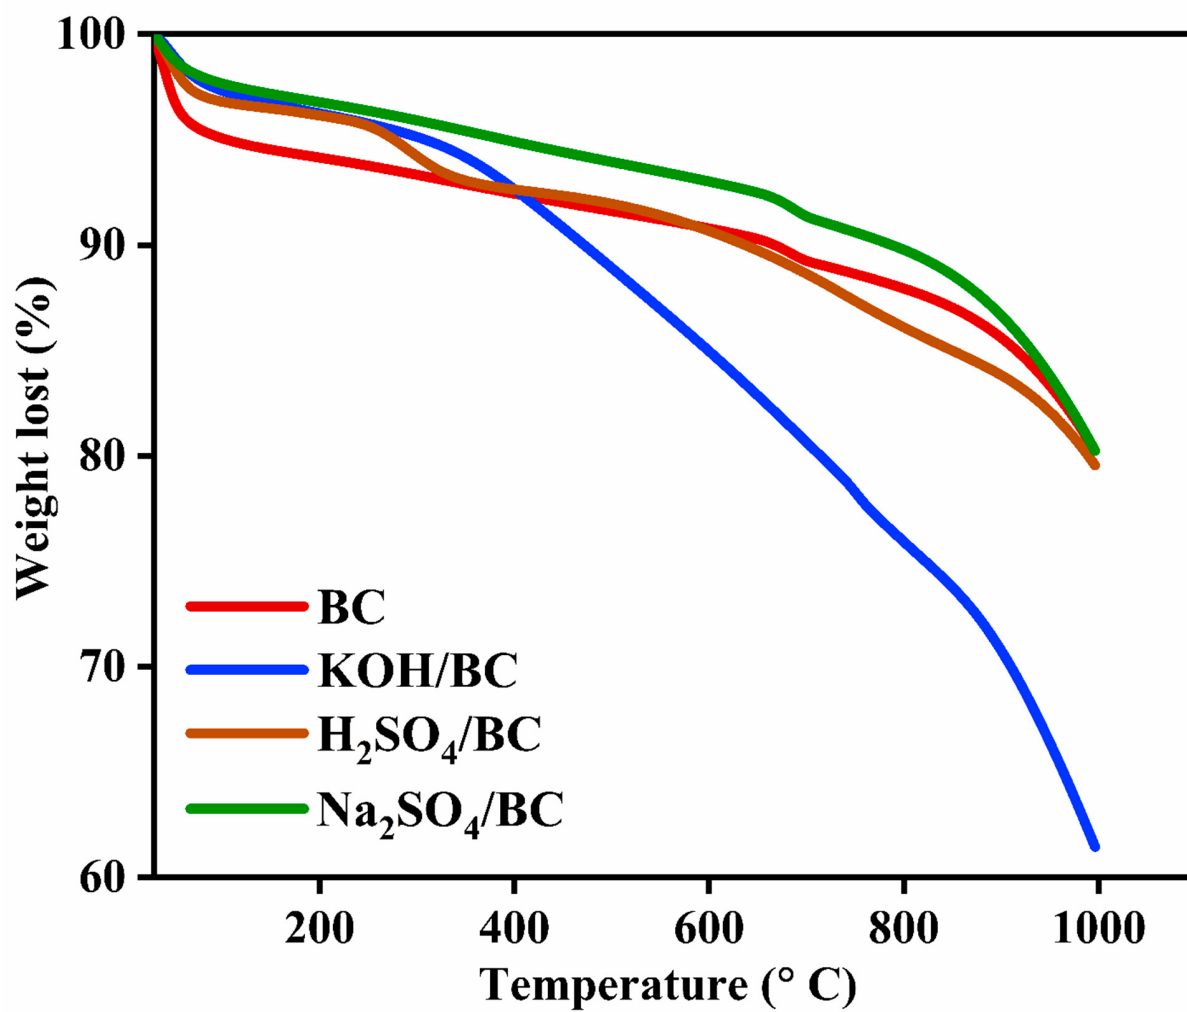

**Figure S2.** Thermogravimetric curve for BC, KOH/BC, Na<sub>2</sub>CO<sub>3</sub>/BC, and H<sub>2</sub>SO<sub>4</sub>/BC in nitrogen for temperature range from 25-1000 ° C.

**Table S1.** Initial physiochemical properties of Bluff, Briar, and Loakfoma lake water samples

|                      | Bluff Lake                   | Briar Lake                    | Loakfoma Lake                |
|----------------------|------------------------------|-------------------------------|------------------------------|
|                      | 33.283072, -88.776972        | 33.432870, -88.767551         | 33.263047, -88.778497        |
| pH                   | 7.99                         | 9.27                          | 9.23                         |
| EC                   | 92.9 $\mu\text{S}/\text{cm}$ | 131.4 $\mu\text{S}/\text{cm}$ | 79.3 $\mu\text{S}/\text{cm}$ |
| Concentrations (ppb) |                              |                               |                              |
| Li                   | 4                            | 1                             | 5                            |
| Na                   | 7983                         | 5123                          | 6877                         |
| Mg                   | 3009                         | 1366                          | 2177                         |
| P                    | Not detected (<1 ppb)        | Not detected (<1 ppb)         | Not detected (<1 ppb)        |
| Ca                   | 5432                         | 23154                         | 3944                         |
| Cr                   | 12                           | 16                            | 17                           |
| Mn                   | 12                           | 4                             | 32                           |
| Fe                   | 758                          | 346                           | 879                          |
| Co                   | Not detected (<1 ppb)        | Not detected (<1 ppb)         | 1                            |
| Ni                   | 2                            | 1                             | 2                            |
| Cu                   | Not detected (<1 ppb)        | Not detected (<1 ppb)         | Not detected (<1 ppb)        |
| Zn                   | Not detected (<1 ppb)        | Not detected (<1 ppb)         | Not detected (<1 ppb)        |
| As                   | Not detected (<1 ppb)        | Not detected (<1 ppb)         | 1                            |
| Se                   | Not detected (<1 ppb)        | Not detected (<1 ppb)         | Not detected (<1 ppb)        |
| Mo                   | Not detected (<1 ppb)        | Not detected (<1 ppb)         | Not detected (<1 ppb)        |
| Ba                   | 23                           | 6                             | 20                           |
| Pb                   | 25                           | 30                            | 36                           |
| U                    | Not detected (<1 ppb)        | Not detected (<1 ppb)         | Not detected (<1 ppb)        |
